# Supplementary material for: Plasma Retinol-Binding Protein-4 Concentrations Are Elevated in Human Subjects With Impaired Glucose Tolerance and Type 2 Diabetes
Source: Oxford University Press journal article supplement (doi:10.2337/dc06-0360), 2006-10-26
Supplement: pg2457onlineappendix.doc [file pg2457onlineappendix.doc]

#### Online Appendix

**1. Detailed methods for RBP4 ELISA**

**1.1. Expression of recombinant RBP4**

The gene encoding human RBP4 was amplified from human visceral fat cDNA library by polymerase chain reaction (PCR). For making Flag-tagged version of the protein the portion of the gene encompassing presumed mature polypeptides was amplified using the following primer set; 1) forward primer : 5- ggaattccatatggagcgcgactgccgagtgagc-3 and 2) reverse primer : 5- cccgctcgagcaaaaggtttctttctgatct-3. The amplified fragment was digested with Nde I and Xho I and then cloned into pET21a (Novagen, Madison, WI). The protein was induced with the addition of IPTG to final 1 mM for 4 hours at 37ºC. Since major fraction of induced RBP4 was found in inclusion body, the protein was subjected to refolding following affinity chromatography according to standard protocol. The refolded protein was dialyzed against 50mM Tris-Cl (pH 8.0) buffer containing 150mM NaCl. Endotoxin was removed through two consecutive column chromatography using Detoxigel (Pierce, Rockford, IL). And it was kept lyophilized until use.

#### 1.2. Generation of polyclonal antibody against human RBP4

Two New Zealand rabbits were repeatedly immunized with recombinant human RBP4 protein until the polyclonal sera from the immunized rabbits exhibited strong immune responses. Prior to bleeding, the rabbits were subjected to final immunization through ear vein. Sera were prepared and immunoglobulin fractions were prepared through Protein A column.

## 1.3. Western blot

Two l serum was subjected to SDS polyacrylamide gel electrophoresis. Subsequently, protein blots were incubated with anti-RBP4 diluted 1:2,000. Target protein bands were detected by chemiluminescence (Pierce).

**1.4. ELISA**

RBP4 competitive ELISA: Recombinant RBP4 was added to each well of microtiter plate to a concentration of 100 ng /ml, and the plate was incubated at overnight at 4ºC. The coated plate was then washed three times with PBST (PBS containing 1% bovine serum albumin and 0.05% Tween 20), blocked with 200 l stabilizer (ABI, Columbia, Maryland) at 37ºC for 1 h and washed three times with PBST. Human sera were diluted 1:100. 50 l was then applied to each well along with standards whose varying concentrations were 2.5 g/ml to 0.001 g/ml. 50 l of anti-RBP4 was then added and incubated at 25ºC for 2h followed by washing three times with PBST. The secondary antibody reaction was performed at 25ºC for 1h followed by washing three times with PBST. Colorimetric reaction was conducted for 20 min with the use of horseradish peroxidase-conjugated streptavidin (Zymed, South San Francisco, CA) diluted 1:1,000 in PBS and 2,2’-azino-bis(2-ethylbenzothiazoline-6-sulfonic acid (Pierce) as substrate. The optical density was measured at 450 nm. For specificity test, the following human adipokines, enzymes, or cytokine were made by AdipoGen, Inc. were tested by this RBP4 ELISA system; adiponectin (RP-A1002), resistin (RP-R1002), RELM  (RP-RB0102), ANGPTL4 (RP-AL4102), ANGPTL6 (AGF) (RP-AF0102), angiopoietin 1(RP-AN10021) and 2 (RP-AN10022), visfatin (RP-VF0102 & RP-VF0103), leptin-Fc, PAI-1-Fc, FABP4 (RP-FB4103), GPX3 (RP-G30102), and single chain IL-23 (RP-IL0102). To calculate coefficient of variation (CV) of intra-assay or inter assay, five plasma samples from healthy subjects were subjected to ELISA in a total of five independent measurements with duplicate. CV (%) is defined as (mean value-standard deviation) / (mean value)  100 %. While intra-assays were conducted at given single day, inter-assays were carried out at given consecutive days. Assay linearity was performed by diluting a serum having known serum RBP4 concentration up to 1:8 and measuring remaining RBP4.

**2. Results for the development of a RBP4 ELISA system and validation**

Using the recombinant RBP4, a polyclonal antibody was generated from rabbits that can recognize plasma RBP4 in western blot. After optimal concentrations of RBP4 for being coated to microtiter plate and polyclonal antibody dilution were determined, a competitive ELISA system was developed for measuring serum or plasma RBP4. While the degree of precision of the ELISA system in terms of CV (%) of intra-assay was between 4 % and 8 %, that of inter-assays was between 5 % and 10 % (online appendix Table 1). Using over 15 different recombinant adipokines or cytokines, specificity of the RBP competitive ELISA system was such tested that no cross reactivity was observed (online appendix Table 2). Assay linearity was shown with over 90 % expectancy (online appendix Table 3). RBP concentrations were measured from various plasma preparations made by sodium citrate, EDTA, and heparin treatment and serum from a given blood (online appendix Table 4). Finally, we compared correlation between this RBP4 ELISA system and phosphor image analysis of western blot. As seen in online appendix Fig. 1, a good correlation was observed between these two systems. Taken together, these data suggest that the established RBP4 ELISA system is suitable for measuring serum or plasma RBP concentrations.
