# Supplementary material for: Plasma Retinol-Binding Protein-4 Concentrations Are Elevated in Human Subjects With Impaired Glucose Tolerance and Type 2 Diabetes
Source: Oxford University Press journal article supplement (doi:10.2337/dc06-0360), 2006-10-26
Supplement: pg2457onlineappendixfigurelegend.doc [file pg2457onlineappendixfigurelegend.doc]

**Figure legend (Online appendix)**

**Online Appendix Figure 1.** Qualitative correlation of the RBP4 ELISA system to analysis of western blot. Three sera were subjected to both ELISA and western blot. Two l serum was directly used for western blot. Bands were visualized by phosphoimage analyzer.

**Online Appendix Figure 2.** Plasma RBP4 concentrations during oral GTT (n = 6).
